# Supplementary material for: Correlation of Nutritional Indices on Admission to the Coronary Intensive Care Unit with the Development of Delirium
Source: PubMed Central journal article supplement (PMC6267104; doi:10.3390/nu10111712), 2018-11-08
Supplement: nutrients-10-01712-s001.pdf [file nutrients-10-01712-s001.pdf]

**Table S1.** Associations between nutritional Indices and several risk factors.

|                                       | GNRI |        | PNI  |        | CONUT |        |
|---------------------------------------|------|--------|------|--------|-------|--------|
|                                       | r    | P      | r    | P      | r     | P      |
| Age, years                            | 0.86 | <0.001 | 0.29 | <0.001 | 0.25  | <0.001 |
| Male, n (%)                           | 0.16 | <0.001 | 0.14 | 0.0003 | 0.06  | NS     |
| Body mass index, kg/m <sup>2</sup>    | 0.40 | <0.001 | 0.18 | <0.001 | 0.17  | <0.001 |
| Left ventricular ejection fraction, % | 0.08 | NS     | 0.10 | 0.019  | 0.12  | 0.005  |
| Diabetes mellitus, n (%)              | 0.04 | NS     | 0.06 | NS     | 0.08  | NS     |
| Dyslipidemia, n (%)                   | 0.15 | 0.0002 | 0.16 | <0.001 | 0.09  | 0.03   |
| Hypertension, n (%)                   | 0.01 | NS     | 0.01 | NS     | 0.03  | NS     |
| Atrial fibrillation, n (%)            | 0.10 | 0.011  | 0.14 | 0.0004 | 0.16  | 0.001  |
| Dementia, n (%)                       | 0.11 | 0.007  | 0.11 | 0.005  | 0.12  | 0.004  |
| Cerebral infarction, n (%)            | 0.00 | NS     | 0.02 | NS     | 0.03  | NS     |
| Malignancy, n (%)                     | 0.18 | <0.001 | 0.17 | <0.001 | 0.21  | <0.001 |
| <b>Laboratory data</b>                |      |        |      |        |       |        |
| Albumin, g/dL                         | 0.93 | <0.001 | 0.87 | <0.001 | 0.78  | <0.001 |
| Total cholesterol, mg/dL              | 0.27 | <0.001 | 0.28 | <0.001 | 0.55  | <0.001 |
| Triglycerides, mg/dL                  | 0.15 | 0.0002 | 0.18 | <0.001 | 0.23  | <0.001 |
| HDL-C, mg/dL                          | 0.19 | <0.001 | 0.18 | <0.001 | 0.33  | <0.001 |
| LDL-C, mg/dL                          | 0.21 | <0.001 | 0.22 | <0.001 | 0.47  | <0.001 |
| Creatinine, mg/dL                     | 0.15 | <0.001 | 0.19 | <0.001 | 0.19  | <0.001 |
| HbA1c, %                              | 0.05 | NS     | 0.04 | NS     | 0.07  | <0.001 |
| CRP, mg/dL                            | 0.45 | <0.001 | 0.46 | <0.001 | 0.49  | <0.001 |
| NT-pro BNP, pg/mL                     | 0.23 | <0.001 | 0.21 | <0.001 | 0.21  | <0.001 |

The association between each nutritional index and risk factors were assessed using the single liner regression analysis. HDL-C, high-density lipoprotein cholesterol; LDL-C, low-density lipoprotein cholesterol; HbA1c, national glycohemoglobin standardization program calculation; CRP, C-reactive protein; NT-pro BNP, N-terminal pro brain natriuretic peptide.
